# Supplementary material for: SMETANA: Accurate and Scalable Algorithm for Probabilistic Alignment of Large-Scale Biological Networks
Source: PubMed Central journal article supplement (PMC3710069; doi:10.1371/journal.pone.0067995), 2013-07-12
Supplement: pone.0067995.s001.pdf [file pone.0067995.s001.pdf]

# Supplementary Material for “SMETANA: Accurate and Scalable Algorithm for Probabilistic Alignment of Large-Scale Biological Networks”

Sayed Mohammad Ebrahim Sahraeian and Byung-Jun Yoon

Department of Electrical and Computer Engineering, Texas A&M University,  
 College Station, TX 77843, USA

## S1 Semi-Markov Random Walk scores

To measure the *global correspondence score* between any two nodes  $u_i \in \mathcal{G}_1$  and  $v_j \in \mathcal{G}_2$ , we compute the the long-run proportion of time that the random walker stays at the node pair  $x = (u_i, v_j)$  in  $\mathcal{G}_X$ . We model the semi-Markov random walk on  $\mathcal{G}_X$  such that  $\mu(x)$ , the expected amount of time that the random walker spends at a node pair  $x = (u_i, v_j)$ , is proportional to the node similarity  $h(u_i, v_j)$ . As a result, both higher interaction similarity as well as higher node similarity between nodes would lead to higher global similarity between them. Thus, as discussed shown in [1, 2], this global correspondence score can be computed as follows:

$$\begin{aligned} s(u_i, v_j) &= \frac{\pi_{\mathcal{X}}(x)\mu(x)}{\sum_{x' \in \mathcal{V}_{\mathcal{X}}} \pi_{\mathcal{X}}(x')\mu(x')} \\ &= \frac{\pi_1(u_i)\pi_2(v_j)h(u_i, v_j)}{\sum_{i'=1}^{|\mathcal{U}|} \sum_{j'=1}^{|\mathcal{V}|} \pi_1(u_{i'})\pi_2(v_{j'})h(u_{i'}, v_{j'})}, \end{aligned} \quad (1)$$

where  $\pi_{\mathcal{X}}$  is the steady state distribution of the Markov random walk on  $\mathcal{G}_X$ , which using the decoupling property of the product graph [3], can be computed as  $\pi_{\mathcal{X}} = \pi_1 \otimes \pi_2$ , where  $\pi_1$  and  $\pi_2$  are the steady state distributions of the random walks on  $\mathcal{G}_1$  and  $\mathcal{G}_2$ , respectively. We can compute these distributions by finding the eigenvectors (with unit eigenvalue) of the transition matrices of each network. We can conveniently rewrite (1) as:

$$\mathbf{S} = \frac{\mathbf{Q} \circ \mathbf{H}}{\text{trace}(\mathbf{Q}\mathbf{H}^T)}, \quad (2)$$

where  $\mathbf{S}$ ,  $\mathbf{H}$ , and  $\mathbf{Q}$  are  $|\mathcal{U}| \times |\mathcal{V}|$ -dimensional matrices such that  $\mathbf{S}[i, j] = s(u_i, v_j)$ ,  $\mathbf{H}[i, j] = h(u_i, v_j)$ , and  $\mathbf{Q}[i, j] = \pi_1(u_i)\pi_2(v_j)$ , and  $\circ$  denotes the Hadamard (or element-wise) product. We compute such correspondence score matrix for all pairs of the given networks.

An important advantage of the SMRW model is its high scalability in terms of network size. A similar random-walk-with-restart approach was originally proposed in [4] to compute functional similarity scores between nodes. As discussed in [2], a practical limitation of the scheme used in [4] is its high computational complexity of  $O(m_1 \cdot m_2)$  for two networks respectively with  $m_1$  and  $m_2$  edges, while the SMRW scheme reduces the computational cost to  $O(m_1 + m_2 + z)$  through decoupling the networks, where  $z$  is the number of non-zero elements in  $\mathbf{H}$ . The matrix  $\mathbf{H}$  is typically sparse, rendering the complexity of the SMRW scheme significantly smaller than that in [4], especially for large networks.

## References

- [1] Sahraeian S, Yoon BJ (2011) A novel low-complexity hmm similarity measure. *Signal Processing Letters, IEEE* 18: 87 -90.
- [2] Sahraeian SM, Yoon BJ (2012) RESQUE: Network reduction using semi-Markov random walk scores for efficient querying of biological networks. *Bioinformatics* 28: 2129–2136.
- [3] Vishwanathan S, Schraudolph NN, Kondor R, Borgwardt KM (2010) Graph Kernels. *Journal of Machine Learning Research* 11: 1201–1242.
- [4] Singh R, Xu J, Berger B (2008) Global alignment of multiple protein interaction networks with application to functional orthology detection. *Proc Natl Acad Sci USA* 105: 12763–12768.

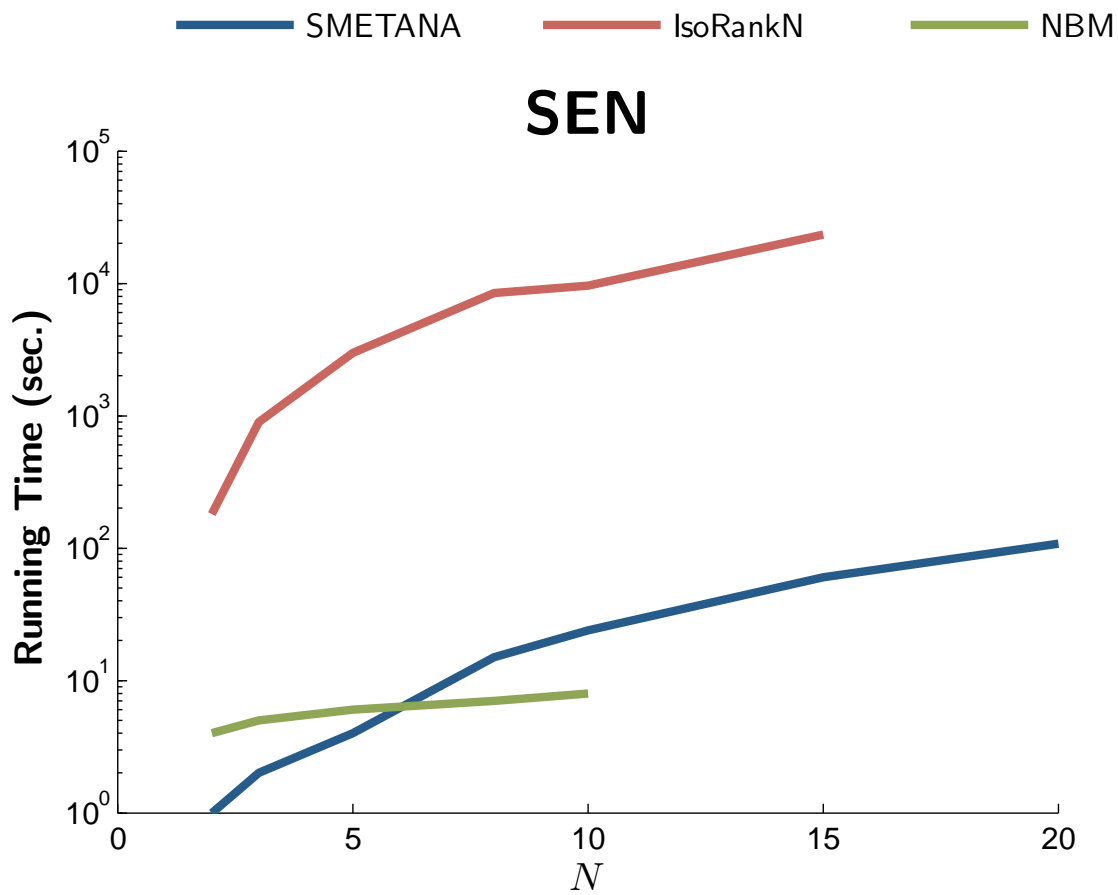

**Figure S1: Total CPU time for aligning real networks.** The trend of change in computation time as the number of networks in the alignment increases.
